# Supplementary material for: Oncogenic cell fate decision in breast epithelial cells I: growth factors and mechanisms
Source: Research Square preprint supplement (doi:10.21203/rs.3.rs-9365348/v1), 2026-05-22
Supplement: Supplementary file 1 [file 4984daa468590b9cdb811081.docx]

**Supplementary Material**

# **Oncogenic cell fate decision in breast epithelial cells I: growth factors and mechanisms**

Divya Muralia*, Shakti Guptaa*, Shankar Subramaniam a, b^

a Department of Bioengineering, UC San Diego, b Departments of Computer Science & Engineering, Cellular & Molecular Medicine, and Nanoengineering, UC San Diego.

*Authors have contributed equally to this work

^author to whom correspondence should be addressed at shankar@ucsd.edu


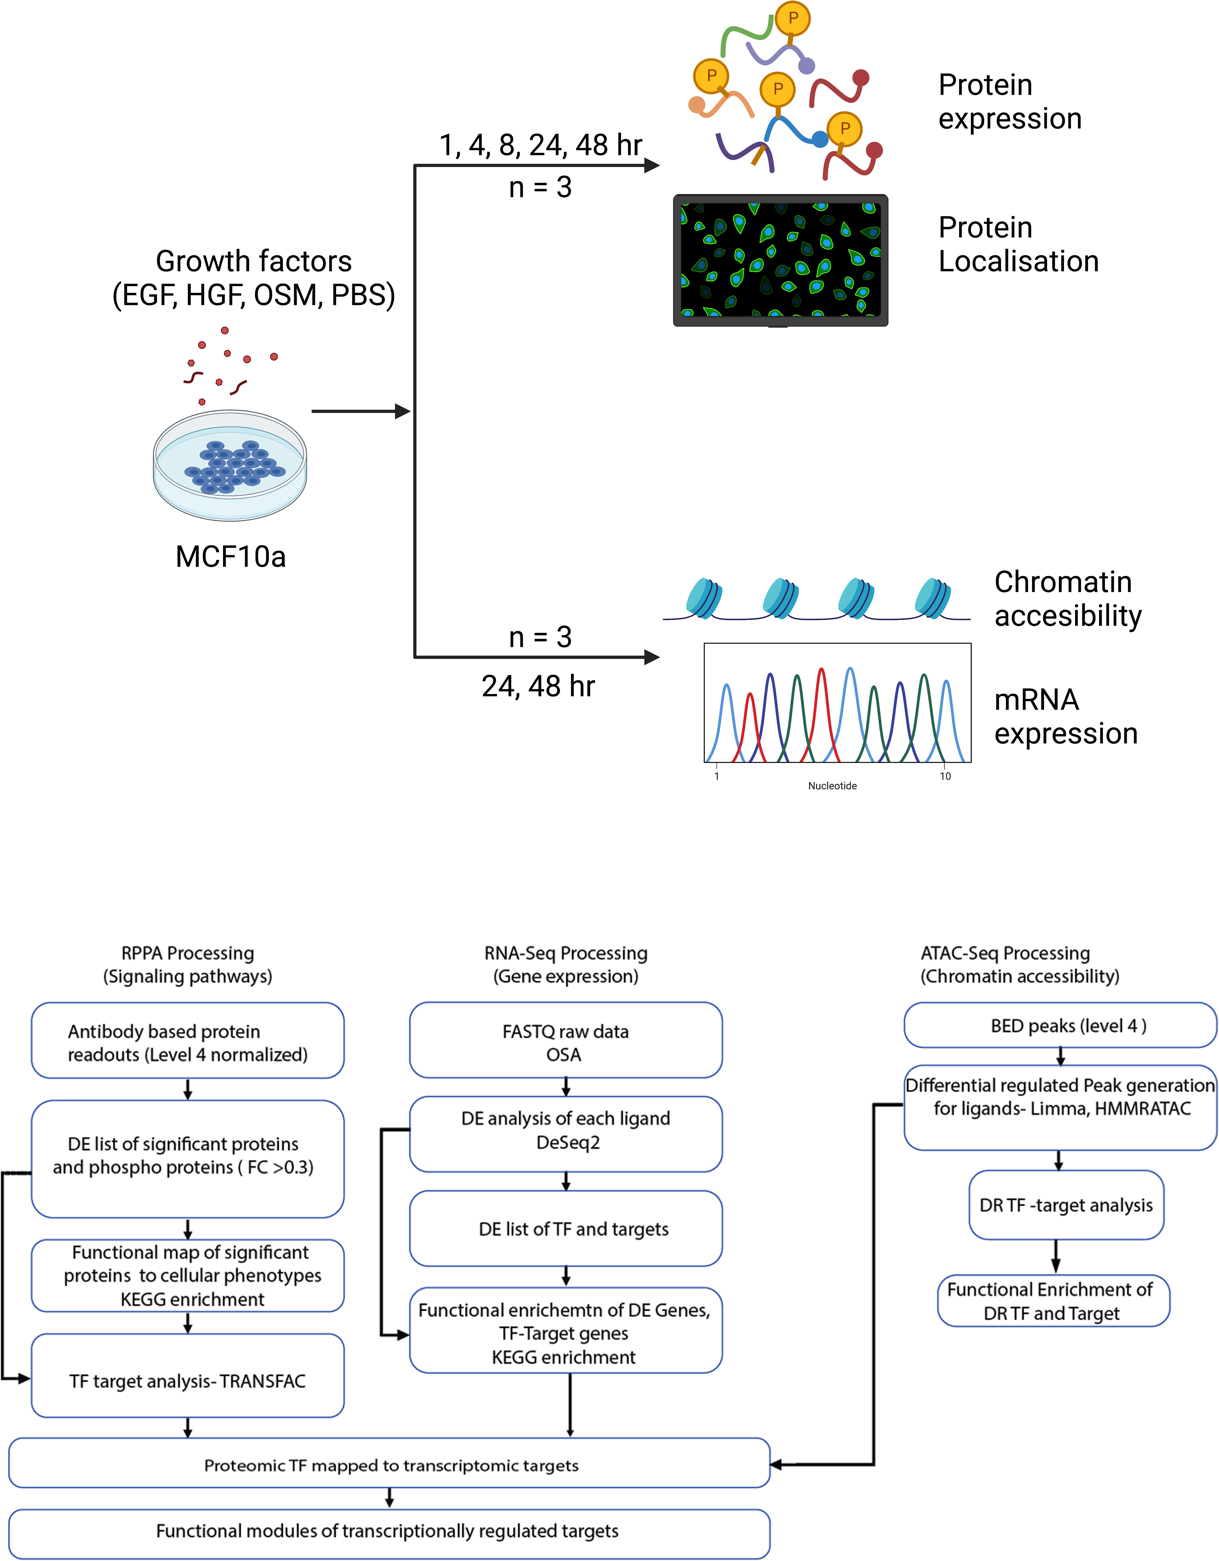


Fig.S1 Schematic representation of the experimental design and Bioinformatics pipeline.


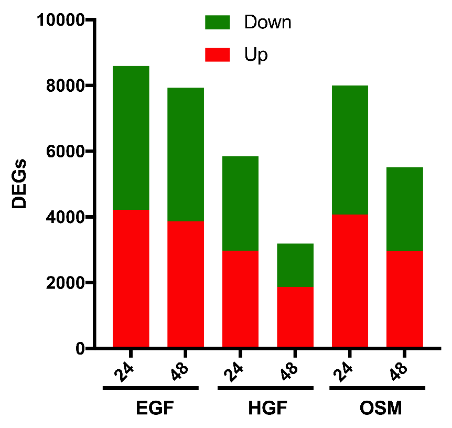


Fig.S2. Bar plots of number of differentially regulated genes (DEGs) from RNAseq measurement in EGF, HGF, and OSM treatments compared to PBS control at 24, and 48 hours. Green represents the number of downregulated genes and red represents the number of upregulated genes.


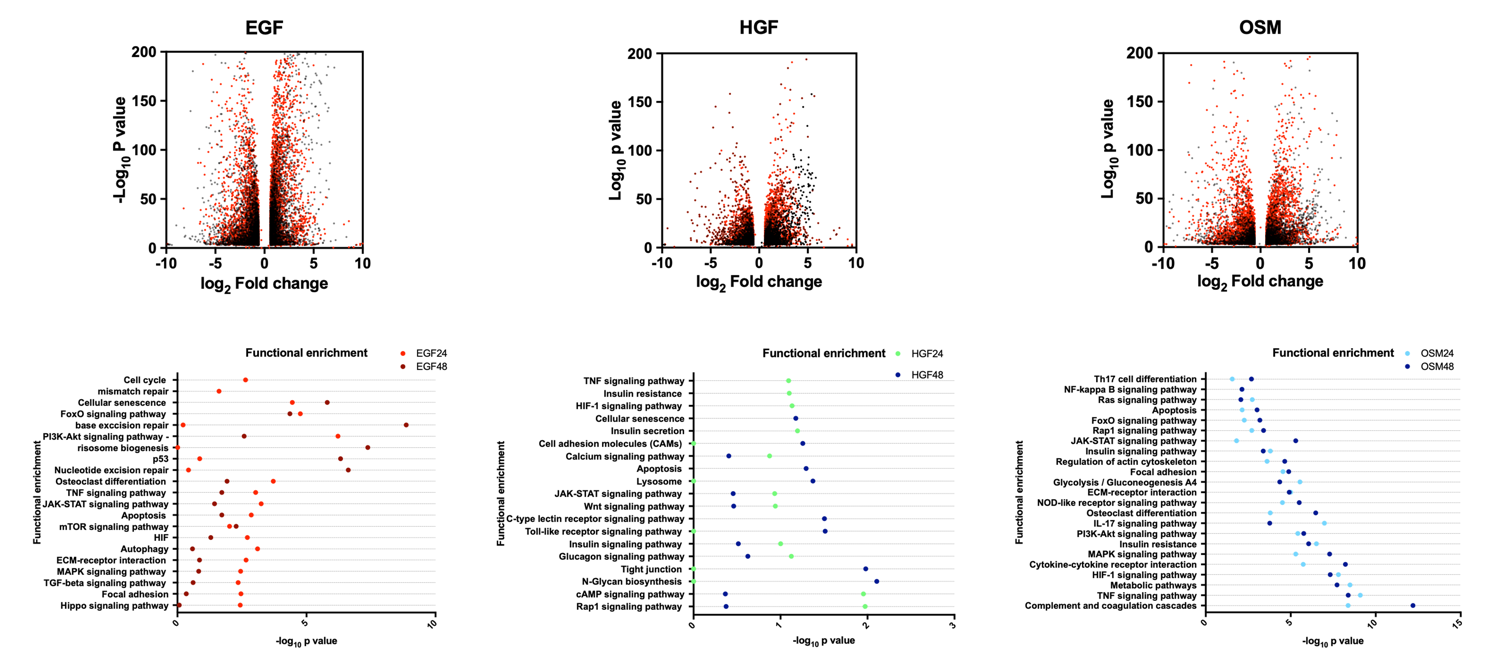


Fig.S3. Pathway enrichment analysis of gene expression signatures using the GO-BP, Hallmark, and Reactome database for the EGF, HGF, and OSM treatments, respectively. Dot color represents the treatment at 24, and 48 hours.
